# Supplementary material
Source: PubMed Central journal article supplement (PMC4771522)
Supplement: NIHMS761087-supplement-2.pdf [file NIHMS761087-supplement-2.pdf]

## Supplementary Online Content

Gregg EW, Chen H, Wagenknecht LE, et al; Look AHEAD Research Group. Association of an intensive lifestyle intervention with remission of type 2 diabetes. *JAMA*. doi:10.1001/jama.2012.67929

**eAppendix.** Look AHEAD Research Group at Year 4

**eTable 1.** Baseline Characteristics of Study Sample According to Inclusion Status

**eTable 2.** Odds Ratios and Probability of Any Remission in Years 2 Through 4 Associated With Key Demographic and Health Status Predictors for the Overall Sample and by Intervention Group

This supplementary material has been provided by the authors to give readers additional information about their work.

## eAppendix. Look AHEAD Research Group at Year 4

Updated 02/09/2012

### Clinical Sites

The Johns Hopkins Medical Institutions Frederick L. Brancati, MD, MHS<sup>1</sup>; Lee Swartz<sup>2</sup>; Lawrence Cheskin, MD<sup>3</sup>; Jeanne M. Clark, MD, MPH<sup>3</sup>; Kerry Stewart, EdD<sup>3</sup>; Richard Rubin, PhD<sup>3</sup>; Jean Arceci, RN; Suzanne Ball; Jeanne Charleston, RN; Danielle Diggins; Mia Johnson; Joyce Lambert; Kathy Michalski, RD; Dawn Jiggetts; Chanchai Sapun

Pennington Biomedical Research Center George A. Bray, MD<sup>1</sup>; Kristi Rau<sup>2</sup>; Allison Strate, RN<sup>2</sup>; Frank L. Greenway, MD<sup>3</sup>; Donna H. Ryan, MD<sup>3</sup>; Donald Williamson, PhD<sup>3</sup>; Brandi Armand, LPN; Jennifer Arceneaux; Amy Bachand, MA; Michelle Begnaud, LDN, RD, CDE; Betsy Berhard; Elizabeth Caderette; Barbara Cerniauskas, LDN, RD, CDE; David Creel, MA; Diane Crow; Crystal Duncan; Helen Guay, LDN, LPC, RD; Carolyn Johnson, Lisa Jones; Nancy Kora; Kelly LaFleur; Kim Landry; Missy Lingle; Jennifer Perault; Cindy Puckett; Mandy Shipp, RD; Marisa Smith; Elizabeth Tucker

The University of Alabama at Birmingham Cora E. Lewis, MD, MSPH<sup>1</sup>; Shekilya Thomas MPH<sup>2</sup>; Monika Safford, MD<sup>3</sup>; Vicki DiLillo, PhD; Charlotte Bragg, MS, RD, LD; Amy Dobelstein; Stacey Gilbert, MPH; Stephen Glasser, MD<sup>3</sup>; Sara Hannum, MA; Anne Hubbell, MS; Jennifer Jones, MA; DeLavallade Lee; Ruth Luketic, MA, MBA, MPH; L. Christie Oden; Janet Raines, MS; Cathy Roche, RN, BSN; Janet Truman; Nita Webb, MA; Casey Azuero, MPH; Jane King, MLT; Andre Morgan

### Harvard Center

Massachusetts General Hospital. David M. Nathan, MD<sup>1</sup>; Enrico Cagliero, MD<sup>3</sup>; Kathryn Hayward, MD<sup>3</sup>; Heather Turgeon, RN, BS, CDE<sup>2</sup>; Linda Delahanty, MS, RD<sup>3</sup>; Ellen Anderson, MS, RD<sup>3</sup>; Laurie Bissett, MS, RD; Valerie Goldman, MS, RD; Virginia Harlan, MSW; Theresa Michel, DPT, DSc, CCS; Mary Larkin, RN; Christine Stevens, RN; Kylee Miller, BA; Jimmy Chen, BA; Karen Blumenthal, BA; Gail Winning, BA; Rita Tsay, RD; Helen Cyr, RD; Maria Pinto

Joslin Diabetes Center: Edward S. Horton, MD<sup>1</sup>; Sharon D. Jackson, MS, RD, CDE<sup>2</sup>; Osama Hamdy, MD, PhD<sup>3</sup>; A. Enrique Caballero, MD<sup>3</sup>; Sarah Bain, BS; Elizabeth Bovaird, BSN, RN; Barbara Fagnoli, MS, RD; Jeanne Spellman, BS, RD; Ann Goebel-Fabbri, PhD; Lori Lambert, MS, RD; Sarah Ledbury, MEd, RD; Maureen Malloy, BS; Kerry Ovalle, MS, RCEP, CDE

Beth Israel Deaconess Medical Center: George Blackburn, MD, PhD<sup>1</sup>; Christos Mantzoros, MD, DSc<sup>3</sup>; Ann McNamara, RN; Kristina Spellman, RD

University of Colorado Health Sciences Center James O. Hill, PhD<sup>1</sup>; Marsha Miller, MS, RD<sup>2</sup>; Brent Van Dorsten, PhD<sup>3</sup>; Judith Regensteiner, PhD<sup>3</sup>; Ligia Coelho, BS; Paulette Cohrs, RN, BSN; Susan Green; April Hamilton, BS, CCRC; Jere Hamilton, BA; Eugene Leshchinskiy; Lindsey Munkwitz, BS; Loretta Rome, TRS; Terra Worley, BA; Kirstie Craul, RD, CDE; Sheila Smith, BS

Baylor College of Medicine John P. Foreyt, PhD<sup>1</sup>; Rebecca S. Reeves, DrPH, RD<sup>2</sup>; Henry Pownall, PhD<sup>3</sup>; Ashok Balasubramanyam, MBBS<sup>3</sup>; Peter Jones, MD<sup>3</sup>; Michele Burrington, RD, RN; Chu-Huang Chen, MD, PhD<sup>3</sup>; Allyson Clark Gardner, MS, RD; Molly Gee, MEd, RD; Sharon Griggs; Michelle Hamilton; Veronica Holley; Jayne Joseph, RD; Julieta Palencia, RN; Jennifer Schmidt; Carolyn White

### The University of Tennessee Health Science Center

University of Tennessee East. Karen C. Johnson, MD, MPH<sup>1</sup>; Carolyn Gresham, RN<sup>2</sup>; Stephanie Connelly, MD, MPH<sup>3</sup>; Amy Brewer, RD, MS; Mace Coday, PhD; Lisa Jones, RN; Lynne Lichtermann, RN, BSN; Shirley Vosburg, RD, MPH; and J. Lee Taylor, MEd, MBA;

University of Tennessee Downtown. Abbas E. Kitabchi, PhD, MD<sup>1</sup>; Ebenezer Nyenwe, MD<sup>3</sup>; Helen Lambeth, RN, BSN<sup>2</sup>; Amy Brewer, MS, RD,LDN; Debra Clark, LPN; Andrea Crisler, MT; Debra Force, MS, RD, LDN; Donna Green, RN; Robert Kores, PhD

University of Minnesota Robert W. Jeffery, PhD<sup>1</sup>; Carolyn Thorson, CCRP<sup>2</sup>; John P. Bantle, MD<sup>3</sup>; J. Bruce Redmon, MD<sup>3</sup>; Richard S. Crow, MD<sup>3</sup>; Scott Crow, MD<sup>3</sup>; Susan K Raatz, PhD, RD<sup>3</sup>; Kerrin Brelje, MPH, RD; Carolyn Campbell; Jeanne Carls, MEd; Tara Carmean-Mihm, BA; Julia Devonish, MS; Emily Finch, MA; Anna Fox, MA; Elizabeth Hoelscher, MPH, RD, CHES; La Donna James; Vicki A. Maddy, BS, RD; Therese Ockenden, RN; Birgitta I. Rice, MS, RPh, CHES; Tricia Skarphol, BS; Ann D. Tucker, BA; Mary Susan Voeller, BA; Cara Walcheck, BS, RD

St. Luke's Roosevelt Hospital Center Xavier Pi-Sunyer, MD<sup>1</sup>; Jennifer Patricio, MS<sup>2</sup>; Stanley Heshka, PhD<sup>3</sup>; Carmen Pal, MD<sup>3</sup>; Lynn Allen, MD; Lolline Chong, BS, RD; Marci Gluck, PhD; Diane Hirsch, RNC, MS, CDE; Mary Anne Holowaty, MS, CN; Michelle Horowitz, MS, RD; Nancy Rau, MS, RD, CDE; Dori Brill Steinberg, BS

University of Pennsylvania Thomas A. Wadden, PhD<sup>1</sup>; Barbara J Maschak-Carey, MSN,CDE<sup>2</sup>; Robert I. Berkowitz, MD<sup>3</sup>; Seth Braunstein, MD, PhD<sup>3</sup>; Gary Foster, PhD<sup>3</sup>; Henry Glick, PhD<sup>3</sup>; Shiriki Kumanyika, PhD, RD, MPH<sup>3</sup>; Stanley S. Schwartz, MD<sup>3</sup>; Michael Allen, RN; Yuliis Bell; Johanna Brock; Susan Brozena, MD; Ray Carvajal, MA; Helen Chomentowski; Canice Crerand, PhD; Renee Davenport; Andrea Diamond, MS, RD; Anthony Fabricatore, PhD; Lee Goldberg, MD; Louise Hesson, MSN, CRNP; Thomas Hudak, MS; Nayyar Iqbal, MD; LaShanda Jones-Corneille, PhD; Andrew Kao, MD; Robert Kuehnel, PhD; Patricia Lipschutz, MSN; Monica Mullen, RD, MPH

University of Pittsburgh John M. Jakicic, PhD<sup>1</sup>; David E. Kelley, MD<sup>1</sup>; Jacqueline Wesche-Thobaben, RN, BSN, CDE<sup>2</sup>; Lewis H. Kuller, MD, DrPH<sup>3</sup>; Andrea Kriska, PhD<sup>3</sup>; Amy D. Otto, PhD, RD, LDN<sup>3</sup>; Lin Ewing, PhD, RN<sup>3</sup>; Mary Korytkowski, MD<sup>3</sup>; Daniel Edmundowicz, MD<sup>3</sup>; Monica E. Yamamoto, DrPH, RD, FADA<sup>3</sup>; Rebecca Danchenko, BS; Barbara Elnyczky; David O. Garcia, MS; George A. Grove, MS; Patricia H. Harper, MS, RD, LDN; Susan Harrier, BS; Nicole L. Helbling, MS, RN; Diane Ives, MPH; Juliet Mancino, MS, RD, CDE, LDN; Anne Mathews, PhD, RD, LDN; Tracey Y. Murray, BS; Joan R. Ritchea; Susan Urda, BS, CTR; Donna L. Wolf, PhD

The Miriam Hospital/Brown Medical School Rena R. Wing, PhD<sup>1</sup>; Renee Bright, MS<sup>2</sup>; Vincent Pera, MD<sup>3</sup>; John Jakicic, PhD<sup>3</sup>; Deborah Tate, PhD<sup>3</sup>; Amy Gorin, PhD<sup>3</sup>; Kara Gallagher, PhD<sup>3</sup>; Amy Bach, PhD; Barbara Bancroft, RN, MS; Anna Bertorelli, MBA, RD; Richard Carey, BS; Tatum Charron, BS; Heather Chenot, MS; Kimberley Chula-Maguire, MS; Pamela Coward, MS, RD; Lisa Cronkite, BS; Julie Currin, MD; Maureen Daly, RN; Caitlin Egan, MS; Erica Ferguson, BS, RD; Linda Foss, MPH; Jennifer Gauvin, BS; Don Kieffer, PhD; Lauren Lessard, BS; Deborah Maier, MS; JP Massaro, BS; Tammy Monk, MS; Rob Nicholson, PhD; Erin Patterson, BS; Suzanne Phelan, PhD; Hollie Raynor, PhD, RD; Douglas Raynor, PhD; Natalie Robinson, MS, RD; Deborah Robles; Jane Tavares, BS

The University of Texas Health Science Center at San Antonio Steven M. Haffner, MD<sup>1</sup>; Helen P. Hazuda, Ph.D.<sup>1</sup>; Maria G. Montez, RN, MSHP, CDE<sup>2</sup>; Carlos Lorenzo, MD<sup>3</sup>; Charles F. Coleman, MS, RD; Domingo Granado, RN; Kathy Hathaway, MS, RD; Juan Carlos Isaac, RC, BSN; Nora Ramirez, RN, BSN; Ronda Saenz, MS, RD  
VA Puget Sound Health Care System / University of Washington Steven Kahn MB, ChB<sup>1</sup>; Brenda Montgomery, RN, MS, CDE<sup>2</sup>; Robert Knopp, MD<sup>3</sup>; Edward Lipkin, MD<sup>3</sup>; Dace Trence, MD<sup>3</sup>; Terry Barrett, BS; Joli Bartell, BA; Diane Greenberg, PhD; Anne Murillo, BS; Betty Ann Richmond, MEd; Jolanta Socha, BS; April Thomas, MPH, RD; Alan Wesley, BA

Southwestern American Indian Center, Phoenix, Arizona and Shiprock, New Mexico William C. Knowler, MD, DrPH<sup>1</sup>; Paula Bolin, RN, MC<sup>2</sup>; Tina Killean, BS<sup>2</sup>; Cathy Manus, LPN<sup>3</sup>; Jonathan Krakoff, MD<sup>3</sup>; Jeffrey M. Curtis, MD, MPH<sup>3</sup>; Justin Glass, MD<sup>3</sup>; Sara Michaels, MD<sup>3</sup>; Peter H. Bennett, MB, FRCP<sup>3</sup>; Tina Morgan<sup>3</sup>; Shandiin Begay, MPH; Paul Bloomquist, MD; Teddy Costa, BS; Bernadita Fallis RN, RHIT, CCS; Jeanette Hermes, MS,RD; Diane F. Hollowbreast; Ruby Johnson; Maria Meacham, BSN, RN, CDE; Julie Nelson, RD; Carol Percy, RN; Patricia Poorthunder; Sandra Sangster; Nancy Scurlock, MSN, ANP-C, CDE; Leigh A. Shovestull, RD, CDE; Janelia Smiley; Katie Toledo, MS, LPC; Christina Tomchee, BA; Darryl Tonemah, PhD

University of Southern California Anne Peters, MD<sup>1</sup>; Valerie Ruelas, MSW, LCSW<sup>2</sup>; Siran Ghazarian Sengardi, MD<sup>2</sup>; Kathryn (Mandy) Graves Hillstrom, EdD, RD, CDE; Kati Konersman, MA, RD, CDE; Sara Serafin-Dokhan

### **Coordinating Center**

Wake Forest University Mark A. Espeland, PhD<sup>1</sup>; Judy L. Bahnson, BA, CCRP<sup>3</sup>; Lynne E. Wagenknecht, DrPH<sup>3</sup>; David Reboussin, PhD<sup>3</sup>; W. Jack Rejeski, PhD<sup>3</sup>; Alain G. Bertoni, MD, MPH<sup>3</sup>; Wei Lang, PhD<sup>3</sup>; Michael S. Lawlor, PhD<sup>3</sup>; David Lefkowitz, MD<sup>3</sup>; Gary D. Miller, PhD<sup>3</sup>; Patrick S. Reynolds, MD<sup>3</sup>; Paul M. Ribisl, PhD<sup>3</sup>; Mara Vitolins, DrPH<sup>3</sup>; Haiying Chen, PhD<sup>3</sup>; Delia S. West, PhD<sup>3</sup>; Lawrence M. Friedman, MD<sup>3</sup>; Brenda L. Craven, MS, CCRP<sup>2</sup>; Kathy M. Dotson, BA<sup>2</sup>; Amelia Hodges, BS, CCRP<sup>2</sup>; Carrie C. Williams, MA, CCRP<sup>2</sup>; Andrea Anderson, MS; Jerry M. Barnes, MA, Mary Barr; Daniel P. Beavers, PhD; Tara Beckner; Cralen Davis, MS; Thania Del Valle-Fagan, MD; Patricia A. Feeney, MS; Candace Goode; Jason Griffin, BS; Lea Harvin, BS; Patricia Hogan, MS; Sarah A. Gaussoin, MS; Mark King, BS; Kathy Lane, BS; Rebecca H. Neiberg, MS; Michael P. Walkup, MS; Karen Wall, AAS; Terri Windham

### **Central Resources Centers**

DXA Reading Center, University of California at San Francisco Michael Nevitt, PhD<sup>1</sup>; Ann Schwartz, PhD<sup>2</sup>; John Shepherd, PhD<sup>3</sup>; Michaela Rahorst; Lisa Palermo, MS, MA; Susan Ewing, MS; Cynthia Hayashi; Jason Maeda, MPH

### **Central Laboratory, Northwest Lipid Metabolism and Diabetes Research**

Laboratories Santica M. Marcovina, PhD, ScD<sup>1</sup>; Jessica Chmielewski<sup>2</sup>; Vinod Gaur, PhD<sup>4</sup>

### **ECG Reading Center, EPICARE, Wake Forest University School of Medicine**

Elsayed Z. Soliman MD, MSc, MS<sup>1</sup>; Ronald J. Prineas, MD, PhD<sup>1</sup>; Charles Campbell<sup>2</sup>; Zhu-Ming Zhang, MD<sup>3</sup>; Teresa Alexander; Lisa Keasler; Susan Hensley; Yabing Li, MD

Diet Assessment Center, University of South Carolina, Arnold School of Public Health, Center for Research in Nutrition and Health Disparities Robert Moran, PhD<sup>1</sup>

Hall-Foushee Communications, Inc. Richard Foushee, PhD; Nancy J. Hall, MA

### **Federal Sponsors**

National Institute of Diabetes and Digestive and Kidney Diseases Mary Evans, PhD; Barbara Harrison, MS; Van S. Hubbard, MD, PhD; Susan Z. Yanovski, MD; Robert Kuczmarski, PhD

National Heart, Lung, and Blood Institute Lawton S. Cooper, MD, MPH; Peter Kaufman, PhD, FABMR

Centers for Disease Control and Prevention Edward W. Gregg, PhD; David F. Williamson, PhD; Ping Zhang, PhD

**eTable 1. Baseline Characteristics of Study Sample According to Inclusion Status**

| Characteristics                    | Primary Analytic Sample |              |              | Excluded Participants |              |              | P value* | Subset Used in Complete Case Analysis for Figure 3 |              |              |
|------------------------------------|-------------------------|--------------|--------------|-----------------------|--------------|--------------|----------|----------------------------------------------------|--------------|--------------|
|                                    | DSE                     | ILI          | Overall      | DSE                   | ILI          | Overall      |          | DSE                                                | ILI          | Overall      |
| Number                             | 2262                    | 2241         | 4503         | 313                   | 329          | 642          |          | 1861                                               | 1852         | 3713         |
| Age, mean (SD), y                  | 59.1 ( 6.9)             | 58.6 ( 6.7)  | 58.9 (6.8)   | 57.5 (6.8)            | 58.1 (7.2)   | 57.8 (7.0)   | 0.01     | 59.1 ( 6.9)                                        | 58.7 (6.7)   | 58.88, (6.8) |
| Male, No. (%)                      | 936 (41.4)              | 940 (41.9)   | 1876 (41.7)  | 102 (32.6)            | 104 (31.6)   | 206 (32.1)   | <0.01    | 789 (42.4)                                         | 765 (41.3)   | 1554 (41.8)  |
| Race / ethnicity No. (%)           |                         |              |              |                       |              |              |          |                                                    |              |              |
| White                              | 364 (16.1)              | 353 (15.8)   | 717 (15.9)   | 40 (12.8)             | 47 (14.3)    | 87 (13.6)    | 0.027    | 306 (16.4)                                         | 293 (15.82)  | 599 (16.1)   |
| African American                   | 120 (5.3)               | 113 (5.0)    | 233 (5.2)    | 8 (2.6)               | 17 (5.2)     | 25 (3.9)     |          | 110 (5.9)                                          | 104 (5.62)   | 214 (5.8)    |
| American Indian                    | 64 (2.8)                | 68 (3.0)     | 132 (2.9)    | 8 (2.6)               | 10 (3.04)    | 18 (2.8)     |          | 55 (3.0)                                           | 59 (3.19)    | 114 (3.1)    |
| Asian/Pacific Islander/Other       | 307 (13.6)              | 305 (13.6)   | 612 (13.6)   | 33 (10.5)             | 35 (10.6)    | 68 (10.6)    |          | 218 (11.7)                                         | 219 (11.83)  | 437 (11.8)   |
| Hispanic                           | 1407 (62.2)             | 1401 (62.5)  | 2808 (62.4)  | 224 (71.6)            | 220 (66.9)   | 444 (69.2)   |          | 1172 (63.0)                                        | 1177 (63.55) | 2349 (63.2)  |
| Education No. (%)                  |                         |              |              |                       |              |              |          |                                                    |              |              |
| < 13 years                         | 463 (20.5)              | 458 (20.5)   | 921 (20.5)   | 52 (16.6)             | 51 (15.5)    | 103 (16.0)   | 0.32     | 362 (19.5)                                         | 360 (19.47)  | 722 (19.5)   |
| 13 to < 16 years                   | 851 (37.6)              | 828 (37.0)   | 1679 (37.3)  | 117 (37.3)            | 119 (36.2)   | 236 (36.8)   |          | 711 (38.2)                                         | 675 (36.51)  | 1386 (37.4)  |
| ≥ 16 years                         | 894 (39.5)              | 912 (40.8)   | 1806 (40.1)  | 133 (42.5)            | 155 (47.1)   | 288 (44.9)   |          | 743 (39.9)                                         | 780 (42.18)  | 1523 (41.1)  |
| CVD History No. (%)                | 313 (13.8)              | 326 (14.6)   | 639 (14.2)   | 35 (11.2)             | 40 (12.2)    | 75 (11.7)    | 0.09     | 252 (13.5)                                         | 271 (14.6)   | 523 (14.1)   |
| Hypertension Medications No. (%)   | 1690 (74.8)             | 1708 (76.2)  | 3398 (75.5)  | 212 (67.7)            | 231 (70.2)   | 443 (69)     | <0.01    | 1377 (74.0)                                        | 1417 (76.5)  | 2794 (75.3)  |
| Diabetes Medications: No. (%)      |                         |              |              |                       |              |              |          |                                                    |              |              |
| None                               | 161 (7.2)               | 153 (6.9)    | 314 (7.0)    | 171 (55.0)            | 196 (60.1)   | 367 (57.6)   | <0.01    | 130 (7.0)                                          | 110 (6.0)    | 240 (6.5)    |
| Orals alone                        | 1650 (73.3)             | 1654 (74.1)  | 3304 (73.7)  | 98 (31.5)             | 95 (29.1)    | 193 (30.3)   |          | 1372 (74.2)                                        | 1358 (73.7)  | 2730 (73.9)  |
| Any insulin                        | 439 (19.5)              | 425 (19.0)   | 864 (19.3)   | 42 (13.5)             | 35 (10.7)    | 77 (12.1)    |          | 348 (18.8)                                         | 375 (20.4)   | 723 (19.6)   |
| Diabetes Duration, median (IQR), y | 5 (7)                   | 5 (8)        | 5 (8)        | 3 (4)                 | 2 (5)        | 2 (4)        | <0.01    | 5 (7)                                              | 5 (8)        | 5 (8)        |
| Height, mean (SD), CM              | 167.3 (9.9)             | 167.3 (9.7)  | 167.3 (9.8)  | 167.2 (9.4)           | 166.5 (8.94) | 166.8 (9.2)  | 0.25     | 167.5 (10.0)                                       | 167.4 (9.7)  | 167.4 (9.8)  |
| Weight, mean (SD), kg              | 100.6 (18.7)            | 100.4 (19.5) | 100.5 (19.1) | 103.0 (19.6)          | 101.9 (20.8) | 102.4 (20.2) | 0.015    | 100.5 (18.5)                                       | 100.0 (19.1) | 100.3 (18.8) |

**eTable 1.** Baseline Characteristics of Study Sample According to Inclusion Status (continued)

| Characteristics          | Primary Analytic Sample |              |              | Excluded Participants |              |              | P value* | Subset Used in Complete Case Analysis for Figure 3 |              |              |
|--------------------------|-------------------------|--------------|--------------|-----------------------|--------------|--------------|----------|----------------------------------------------------|--------------|--------------|
|                          | DSE                     | ILI          | Overall      | DSE                   | ILI          | Overall      |          | DSE                                                | ILI          | Overall      |
| Fitness, mean (SD), METS | 7.2 (2.0)               | 7.2 (1.9)    | 7.2 (2.0)    | 7.3 (1.9)             | 7.2 (2.0)    | 7.3 (1.0)    | 0.44     | 7.2 (2.0)                                          | 7.2 (1.9)    | 7.2 (2.0)    |
| HbA1c, mean (SD), %      | 7.37, 1.17              | 7.34, 1.14   | 7.4 (1.2)    | 6.87 (1.3)            | 6.7 (1.0)    | 6.8 (1.2)    | <0.01    | 7.4 (1.2)                                          | 7.4 (1.1)    | 7.4 (1.2)    |
| FPG, mean (SD), mg/dl )  | 155.6 (46.1)            | 154.4 (44.9) | 155.0 (45.5) | 142.7 (48.1)          | 138.2 (41.1) | 140.4 (44.7) | <0.01    | 155.5 (45.9)                                       | 154.9 (45.3) | 155.2 (45.6) |
| BMI, mean (SD), kg/m2    | 35.9 (5.7)              | 35.8, (5.9)  | 35.8 (5.8)   | 36.8 (6.3)            | 36.7 (6.9)   | 36.8 (6.6)   | <0.01    | 35.8 (5.7)                                         | 35.7 (5.8)   | 35.7 (5.7)   |

\*BMI: Body mass index ; CVD: Cardiovascular disease; FPG: fasting plasma glucose. Cardiovascular disease history was defined by self-reported history of stroke or heart attack. . p value: test for difference between primary analytic sample and excluded participants.)

**eTable 2.** Odds Ratios and Probability of Any Remission in Years 2 Through 4 Associated With Key Demographic and Health Status Predictors for the Overall Sample and by Intervention Group

|                                  | N (%)       | 2nd to 4th Year<br>Univariate Odds Ratio<br>(Overall Sample) | 2nd to 4th Year<br>Multivariate Odds Ratio<br>(Overall Sample) | Unadjusted Probability of<br>2nd through 4th Year Remission |               |               |
|----------------------------------|-------------|--------------------------------------------------------------|----------------------------------------------------------------|-------------------------------------------------------------|---------------|---------------|
|                                  |             |                                                              |                                                                | Overall                                                     | DSE (%)       | ILI (%)       |
| Men                              | 1876 (41.7) | 1.0                                                          | 1.0                                                            | 1.5 (1.3-1.9)                                               | 1.1(0.8–1.5)  | 2.0 (1.5–2.7) |
| Women                            | 2627 (58.3) | 0.99 (0.80-1.22)                                             | 0.87 (0.67-1.13)                                               | 1.5 (1.3-1.8)                                               | 1.1 (0.8–1.4) | 2.0 (1.5–2.5) |
| Age (y)                          |             |                                                              |                                                                |                                                             |               |               |
| Low (44 to < 56)                 | 1383 (30.7) | 1.0                                                          | 1.0                                                            | 1.4 (1.1-1.8)                                               | 1.2 (0.8–1.7) | 1.7 (1.2–2.4) |
| Middle (56 to < 61)              | 1596 (35.4) | 1.20 (0.92-1.56)                                             | 1.33 (0.97-1.83)                                               | 1.7 (1.4-2.0)                                               | 1.1 (0.8–1.6) | 2.4 (1.8–3.2) |
| High (> 61 to 76)                | 1524 (33.8) | 1.06 (0.82-1.38)                                             | 1.28 (0.93-1.77)                                               | 1.5 (1.2-1.8)                                               | 0.9 (0.6–1.3) | 1.8 (1.3–2.6) |
| Race/Ethnicity                   |             |                                                              |                                                                |                                                             |               |               |
| White                            | 2808 (62.3) | 1.0                                                          | 1.0                                                            | 1.5 (1.3-1.8)                                               | 1.0 (0.6-1.7) | 1.4 (0.8-2.4) |
| African-American                 | 717 (15.9)  | 0.84 (0.62-1.14)                                             | 1.05 (0.72-1.54)                                               | 1.3 (0.9-1.7)                                               | 2.0 (1.0-3.8) | 2.8 (1.5-5.2) |
| American Indian                  | 233 (5.2)   | 1.23 (0.79-1.92)                                             | 2.00 (1.18-3.40)                                               | 1.9 (1.2-2.8)                                               | 0.7 (0.1-4.5) | 1.6 (0.5-4.3) |
| Asian-Pacific Islander           | 132 (2.9)   | 0.83 (0.35-1.87)                                             | 0.83 (0.25-2.73)                                               | 1.2 (0.5-2.8)                                               | 1.3 (0.7-2.1) | 3.1 (2.1-4.6) |
| Hispanic                         | 612 (13.6)  | 1.19 (0.87-1.62)                                             | 1.54 (1.07-2.23)                                               | 1.8 (1.3-2.4)                                               | 1.0 (0.7-1.3) | 1.9 (1.5-2.4) |
| Diabetes Duration (y)            |             |                                                              |                                                                |                                                             |               |               |
| Low (0 to < 2)                   | 1168 (26.1) | 1.0                                                          | 1.0                                                            | 2.3 (2.0-2.9)                                               | 1.9 (1.4–2.6) | 3.6 (2.8–4.7) |
| Middle (2 to < 7)                | 1707 (38.2) | 0.69 (0.54-0.88)                                             | 0.70 (0.53-0.93)                                               | 1.6 (1.2-1.8)                                               | 1.2 (0.8–1.7) | 2.0 (1.5–2.7) |
| High ( $\geq$ 7)                 | 1597 (35.7) | 0.40 (0.30-0.55)                                             | 0.48 (0.33-0.69)                                               | 0.9 (0.7-1.2)                                               | 0.4 (0.2–0.7) | 0.9 (0.6–1.4) |
| BMI Tertile (kg/m <sup>2</sup> ) |             |                                                              |                                                                |                                                             |               |               |
| Low (< 32.5)                     | 1501 (33.3) | 1.0                                                          | 1.0                                                            | 1.5 (1.2-1.8)                                               | 0.8 (0.5–1.2) | 2.2 (1.6–2.9) |
| Middle (32.5 - 37.7)             | 1501 (33.3) | 0.98 (0.76-1.26)                                             | 0.95 (0.72-1.27)                                               | 1.5 (1.3-1.8)                                               | 1.0 (0.7–1.5) | 1.8 (1.3–2.5) |
| High (> 37.7)                    | 1501 (33.3) | 1.06 (0.82-1.37)                                             | 1.10 (0.81-1.48)                                               | 1.6 (1.3-2.0)                                               | 1.4 (1.0–2.0) | 2.0 (1.5–2.7) |
| HbA1c Tertile (%)                |             |                                                              |                                                                |                                                             |               |               |
| Low (< 6.7)                      | 1300 (28.9) | 1.0                                                          | 1.0                                                            | 2.4 (0.02-0.3)                                              | 1.5 (1.1–2.1) | 3.5 (2.7–4.5) |
| Middle (6.7 to 7.6)              | 1634 (38.2) | 0.62 (0.49-0.79)                                             | 0.64 (0.49-0.83)                                               | 1.5 (0.01-0.2)                                              | 1.2 (0.8–1.7) | 1.9 (1.4–2.6) |
| High (> 7.6)                     | 1569 (35.7) | 0.37 (0.27-0.50)                                             | 0.46 (0.32-0.64)                                               | 0.9 (0.01-0.1)                                              | 0.6 (0.4–1.0) | 1.0 (0.6–1.5) |

**Table 2.** Odds Ratios and Probability of Any Remission in Years 2 Through 4 Associated With Key Demographic and Health Status Predictors for the Overall Sample and by Intervention Group (continued)

|                         | N (%)       | 2nd to 4th Year<br>Univariate Odds Ratio<br>(Overall Sample) | 2nd to 4th Year<br>Multivariate Odds Ratio<br>(Overall Sample) | Unadjusted Probability of<br>2nd through 4th Year Remission |               |               |
|-------------------------|-------------|--------------------------------------------------------------|----------------------------------------------------------------|-------------------------------------------------------------|---------------|---------------|
|                         |             |                                                              |                                                                | Overall                                                     | DSE (%)       | ILI (%)       |
| No insulin use          | 2251 (80.7) | 1.0                                                          | 1.0                                                            | 1.7 (1.4-2.0)                                               | 1.2 (1.0-1.5) | 2.3 (1.9-2.8) |
| Insulin use             | 864 (19.3)  | 0.50 (0.34-0.75)                                             | 0.61 (0.37-1.01)                                               | 0.8 (0.6-1.2)                                               | 0.5 (0.3-1.0) | 0.7 (0.4-1.4) |
| HTN meds                | 3398 (75.5) | 1.04 (0.86-1.32)                                             | 1.05 (0.79-1.38)                                               | 1.5 (1.3-1.8)                                               | 1.1 (0.9-1.4) | 2.0 (1.6-2.5) |
| No HTN meds             | 571, 25.25  | 1.0                                                          | 1.0                                                            | 1.5 (1.2-1.9)                                               | 1.0 (0.6-1.5) | 2.0 (1.4-2.9) |
| CVD history             | 639 (14.2)  | 0.72 (0.50-1.05)                                             | 0.72 (0.45-1.13)                                               | 1.2 (0.8-1.6)                                               | 0.5 (0.2-1.2) | 1.1 (0.6-2.1) |
| No CVD history          | 1949 (86.2) | 1.0                                                          | 1.0                                                            | 1.6 (1.3-1.9)                                               | 1.2 (0.9-1.5) | 2.2 (1.8-2.6) |
| 1-y weight change (%)   |             |                                                              |                                                                |                                                             |               |               |
| Low ( $\geq 1$ )        | 1464 (33.3) | 1.0                                                          | 1.0                                                            | 2.7 (2.2-3.2)                                               | 1.6 (1.0-2.7) | 3.1 (2.6-3.9) |
| Middle (1 to < -6.5)    | 1465 (33.4) | 0.41 (0.30-0.54)                                             | 0.36 (0.26-0.50)                                               | 1.1 (0.8-1.4)                                               | 1.3 (0.9-1.8) | 0.9 (0.6-1.3) |
| High (< -6.5)           | 1464 (33.3) | 0.34 (0.24-0.47)                                             | 0.32 (0.20-0.52)                                               | 0.9 (0.7-1.2)                                               | 0.7 (0.5-1.1) | 0.6 (0.3-1.5) |
| 1-y fitness change (%)  |             |                                                              |                                                                |                                                             |               |               |
| Low (< -2.3)            | 925 (24.4)  | 1.0                                                          | 1.0                                                            | 1.2 (0.9-1.6)                                               | 0.8 (0.5-1.3) | 1.4 (0.8-2.3) |
| Middle (2.3 to < 17.9)  | 1593 (42.0) | 1.14 (0.80-1.60)                                             | 1.04 (0.71-1.54)                                               | 1.3 (1.1-1.7)                                               | 0.9 (0.6-1.4) | 1.4 (1.0-2.0) |
| High ( $\geq 17.9$ )    | 1274 (33.6) | 1.75 (1.25-2.46)                                             | 1.28 (0.87-1.89)                                               | 2.1 (1.7-2.6)                                               | 1.5 (1.0-2.2) | 3.0 (2.3-3.8) |
| 1-y PA change (kcal/wk) |             |                                                              |                                                                |                                                             |               |               |
| Low (< -4)              | 657 (33.0)  | 1.0                                                          | 1.0                                                            | 1.0 (0.7-1.5)                                               | 0.8 (0.5-1.4) | 1.6 (0.9-3.1) |
| Middle (-4 to < 729)    | 672 (33.7)  | 2.12 (1.25-3.61)                                             | 0.87 (0.31-1.49)                                               | 1.1 (0.8-1.6)                                               | 0.4 (0.2-0.9) | 1.2 (0.6-2.2) |
| High ( $\geq 729$ )     | 665 (33.4)  | 4.38 (2.68-7.16)                                             | 0.98 (0.58-1.66)                                               | 1.5 (1.1-2.1)                                               | 0.9 (0.4-2.1) | 2.2 (1.5-3.3) |

Category thresholds for diabetes duration, BMI, HbA1c, weight change, fitness change, and physical activity change based on tertiles of the overall sample.
